# Supplementary material for: Water-Soluble Quaternary and Protonable Basic Chitotriazolans: Synthesis by Click Chemistry Conversion of Chitosan Azides and Investigation of Antibacterial Activity
Source: MDPI journal article supplement (doi:10.3390/jfb15030063), 2024-03-05
Supplement: s1 [file s1]

Supplementary Materials

# Water-Soluble Quaternary and Protonable Basic Chitotriazolans: Synthesis by Click Chemistry Conversion of Chitosan Azides and Investigation of Antibacterial Activity

Sankar Rathinam <sup>1</sup>, Romano Magdadaro <sup>1</sup>, Martha Á. Hjálmarsdóttir <sup>2</sup> and Már Másson <sup>1,\*</sup>

<sup>1</sup> Faculty of Pharmaceutical Sciences, School of Health Sciences, University of Iceland, Hofsvallagata 53, IS-107 Reykjavík, Iceland; sankar@hi.is (S.R.); c18434796@mytudublin.ie (R.M.)

<sup>2</sup> Department of Biomedical Science, Faculty of Medicine, School of Health Sciences, University of Iceland, Hringbraut 31, IS-101 Reykjavík, Iceland; hjalmars@hi.is

\* Correspondence: mmasson@hi.is

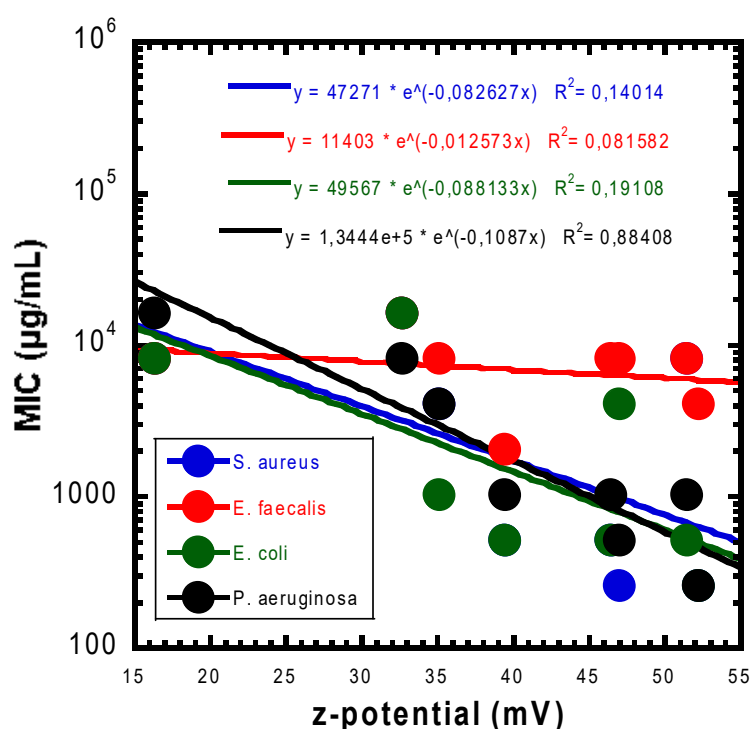

Figure S1. Correlation between MIC values and z-potential.

Derivative 1

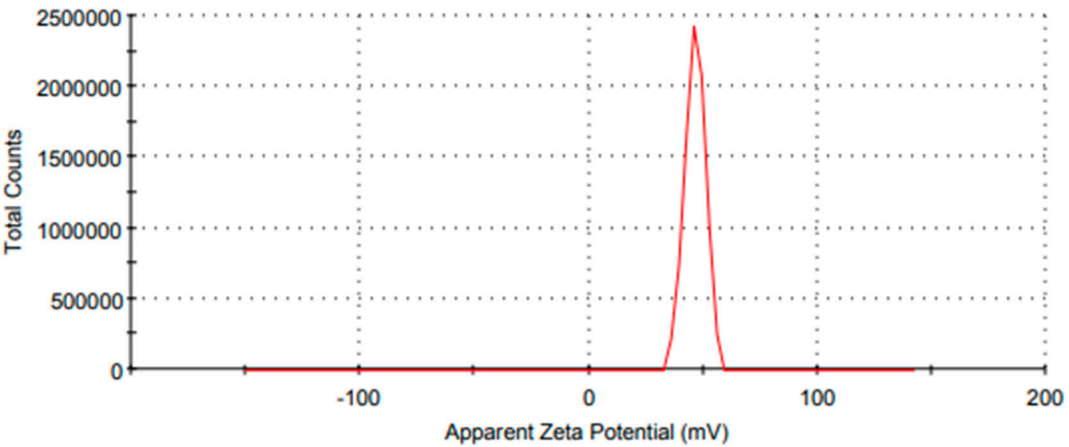

Derivative 2

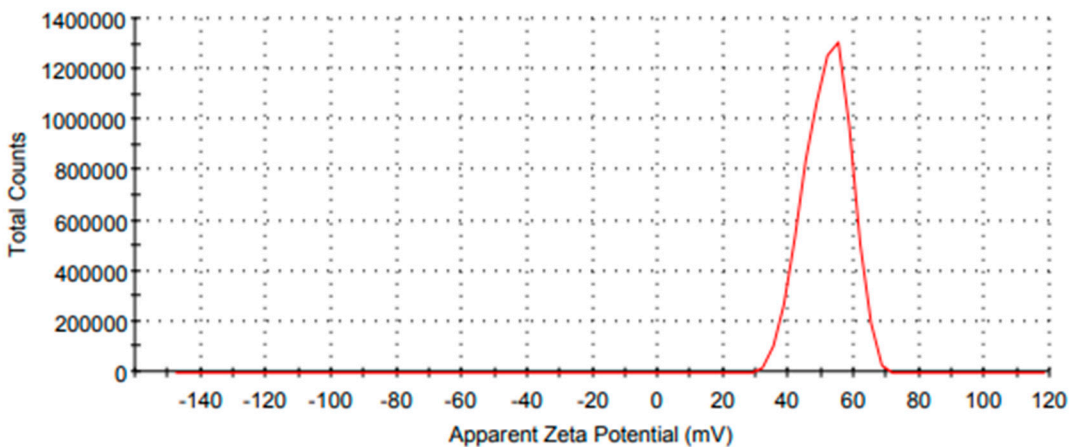

Derivative 3

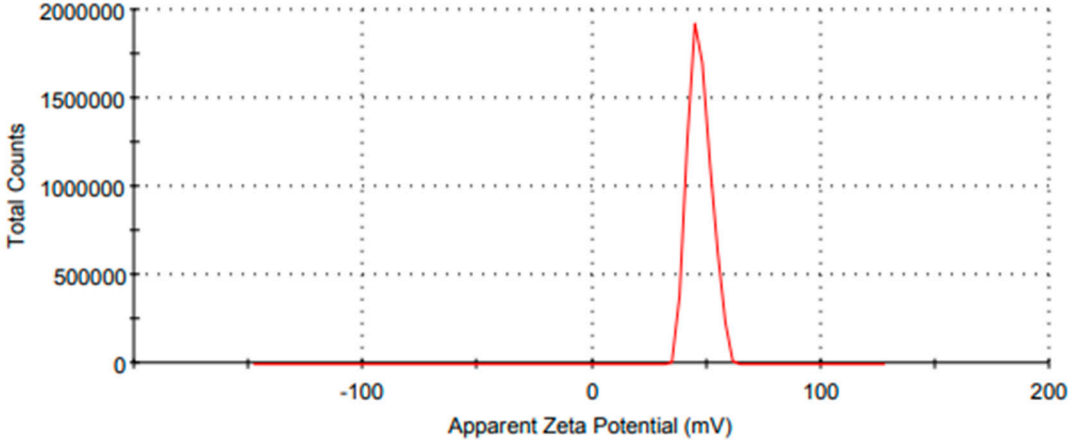

Derivative 4

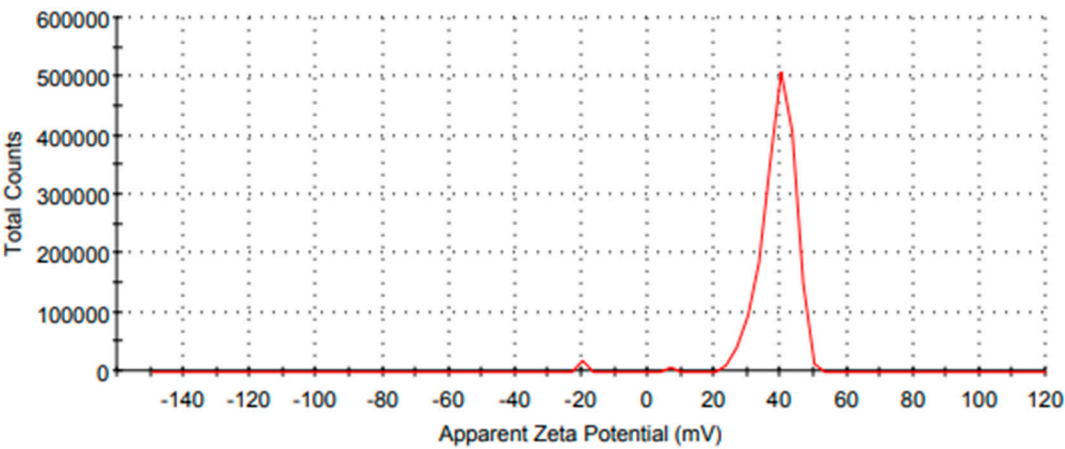

Derivative 5

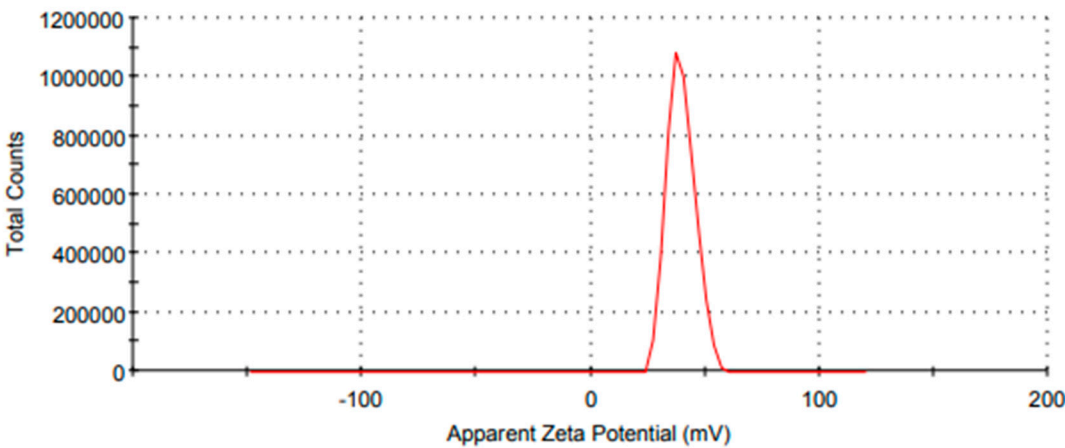

Derivative 6

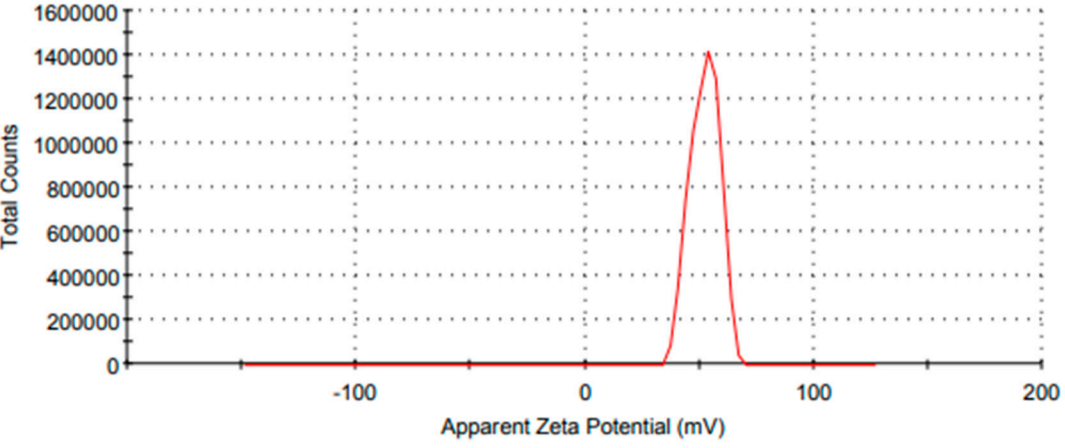

## Derivative 7

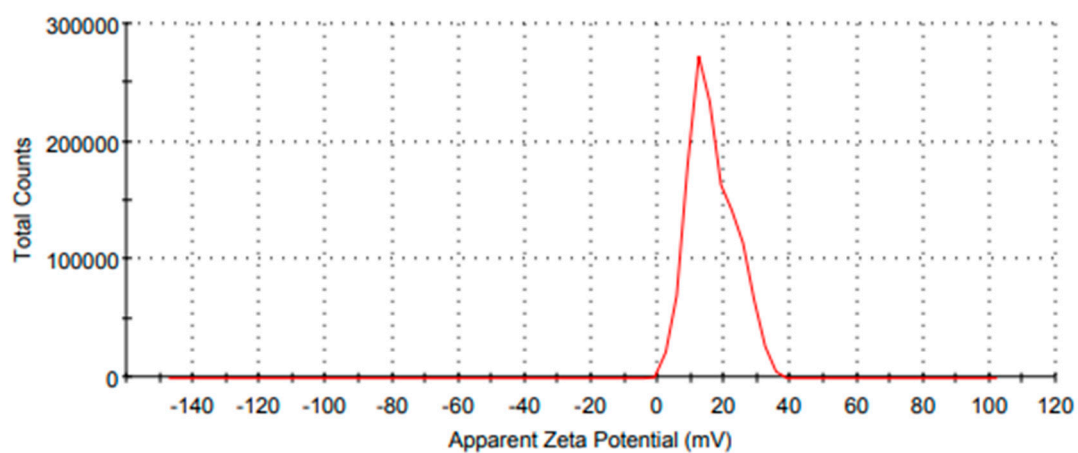

## Derivative 8

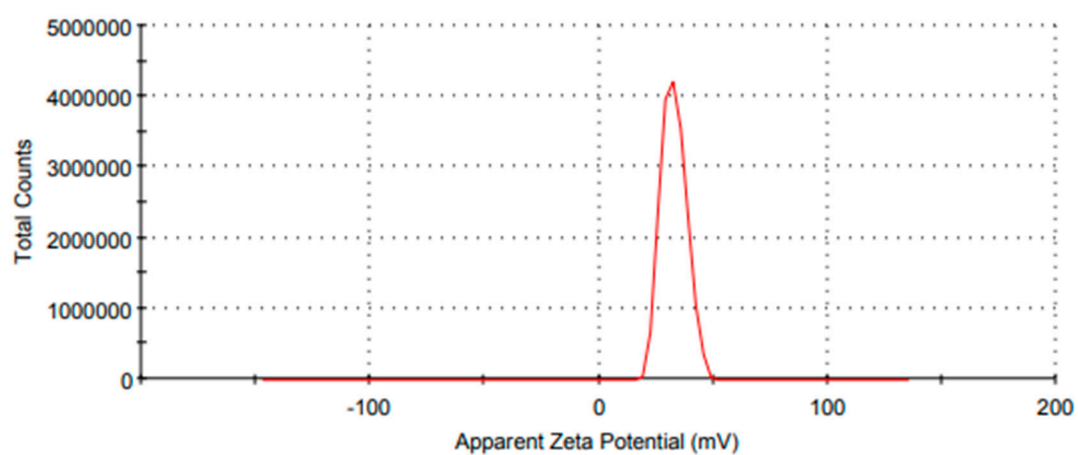

## Derivative 9

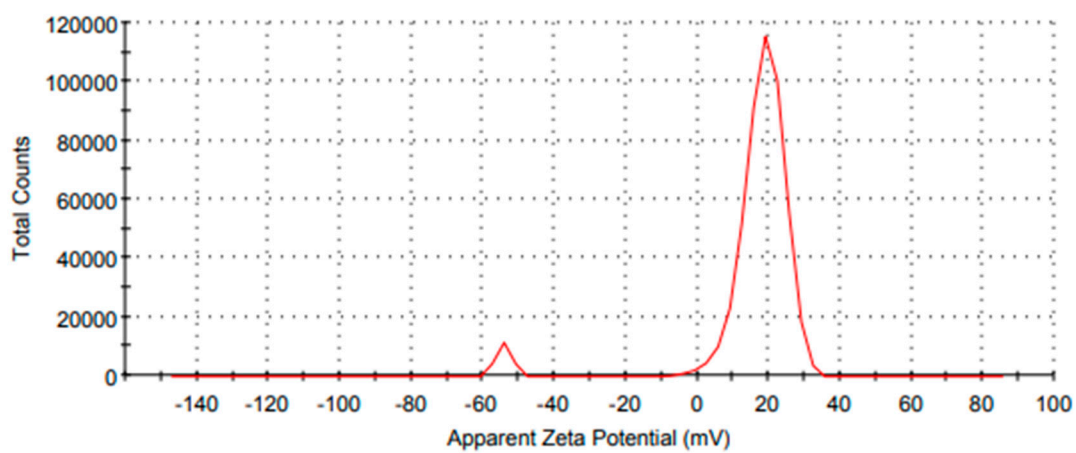

Figure S2. Zeta potential chromatogram (Derivative 1–9).

## Proton NMR of 1

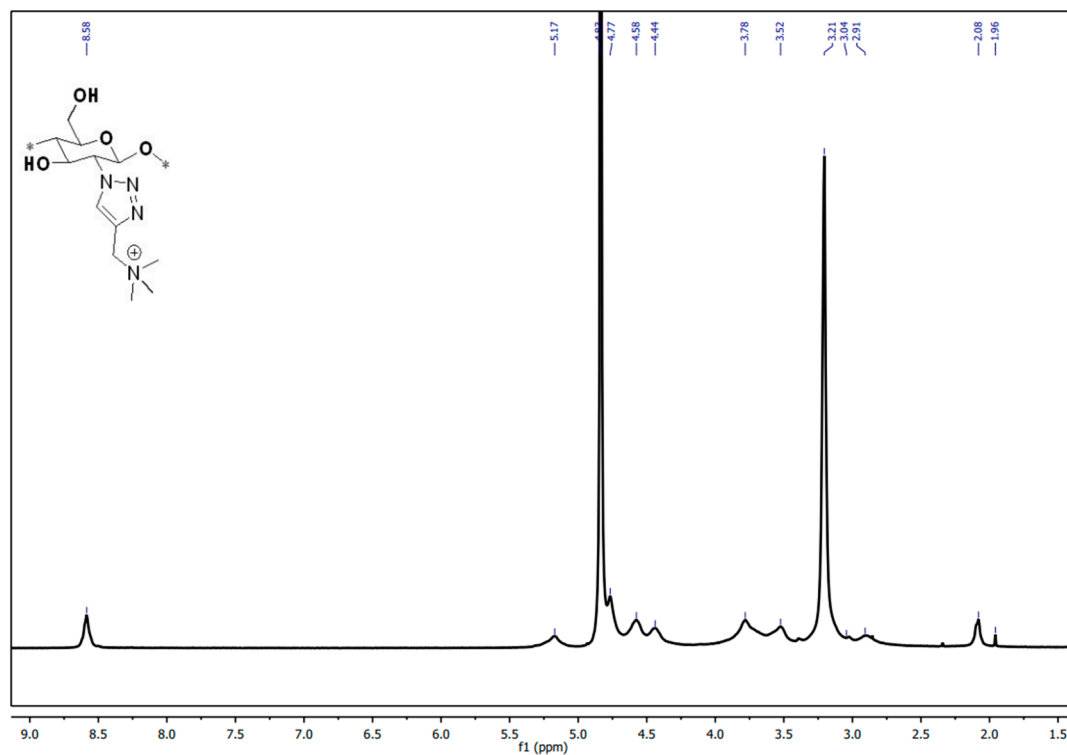

## Proton NMR of 2

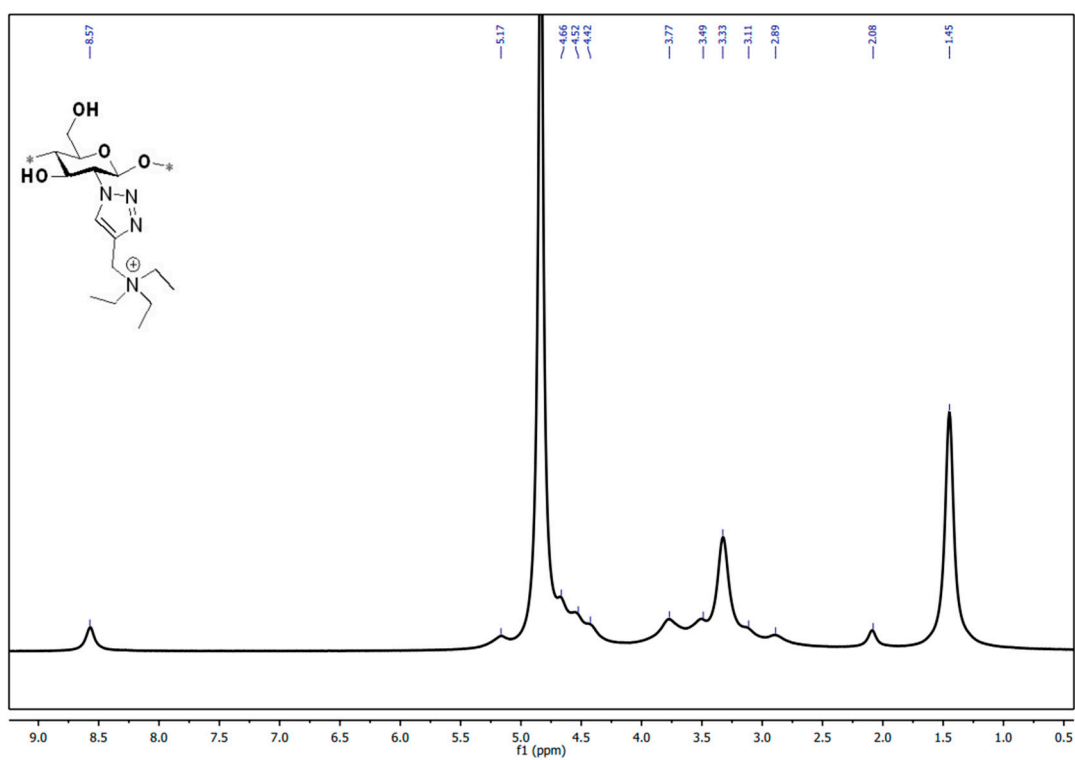

## Proton NMR of 3

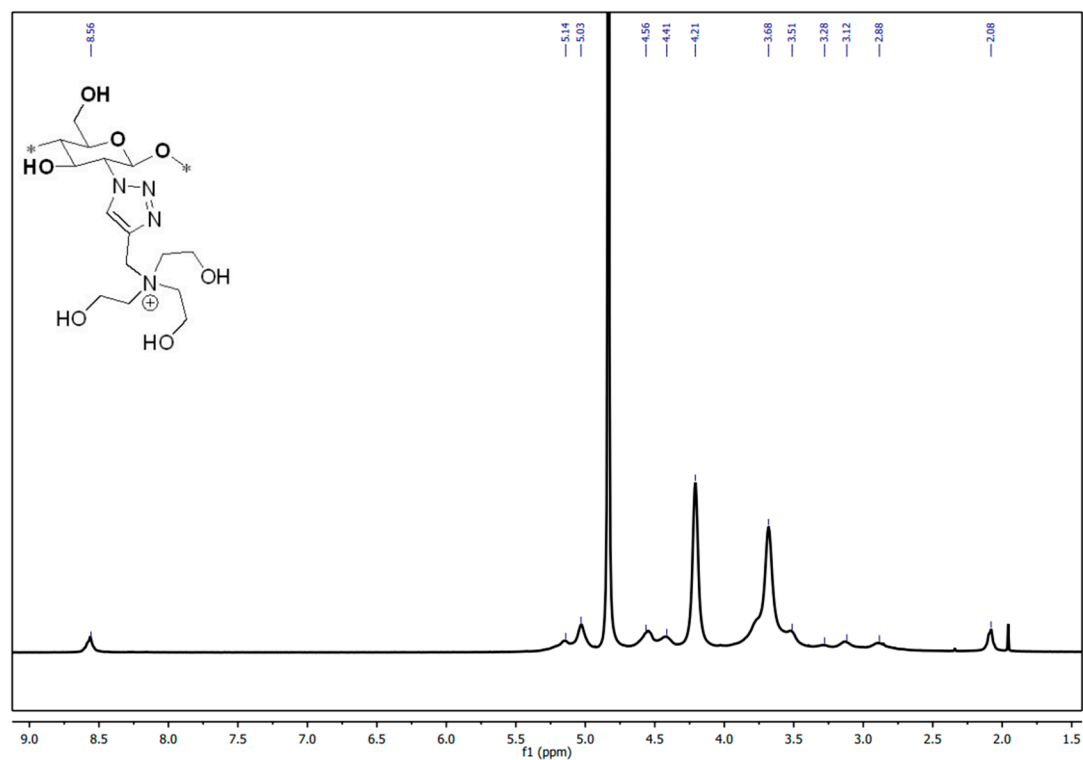

## Proton NMR of 4

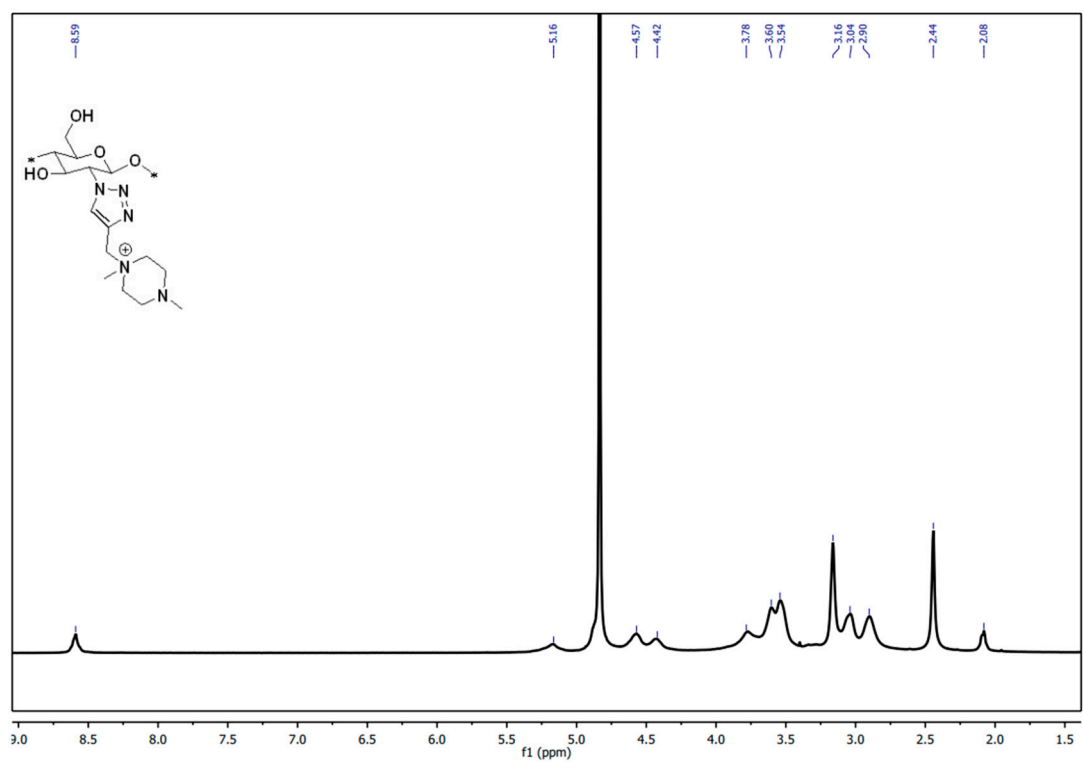

## Proton NMR of 5

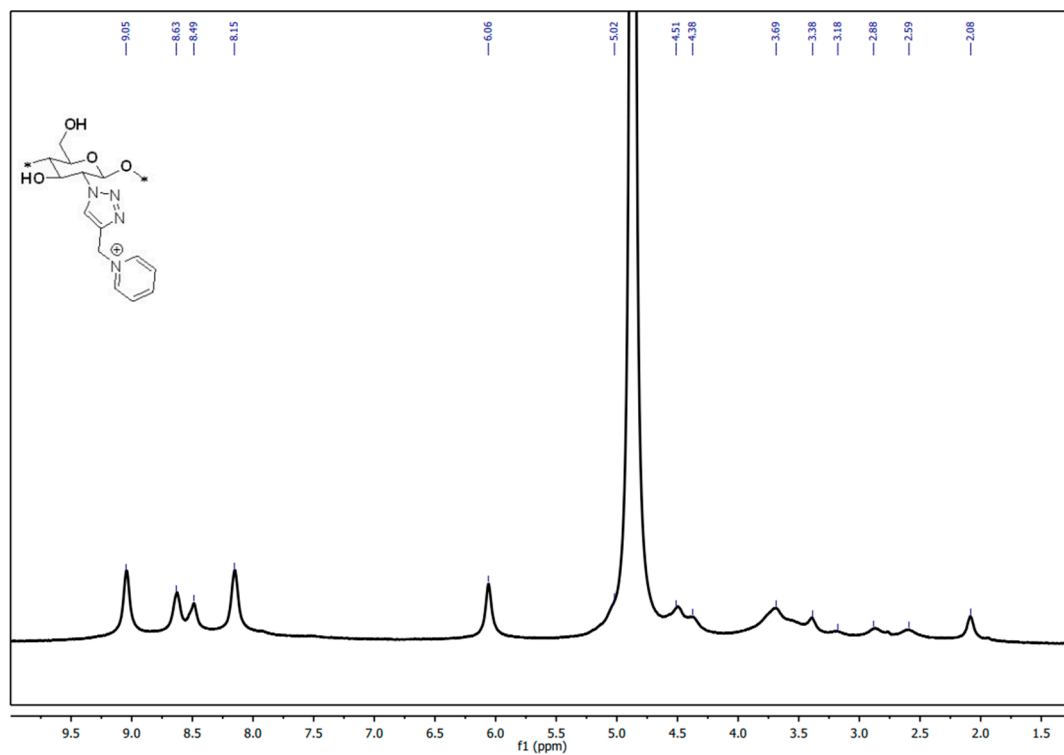

## Proton NMR of 6

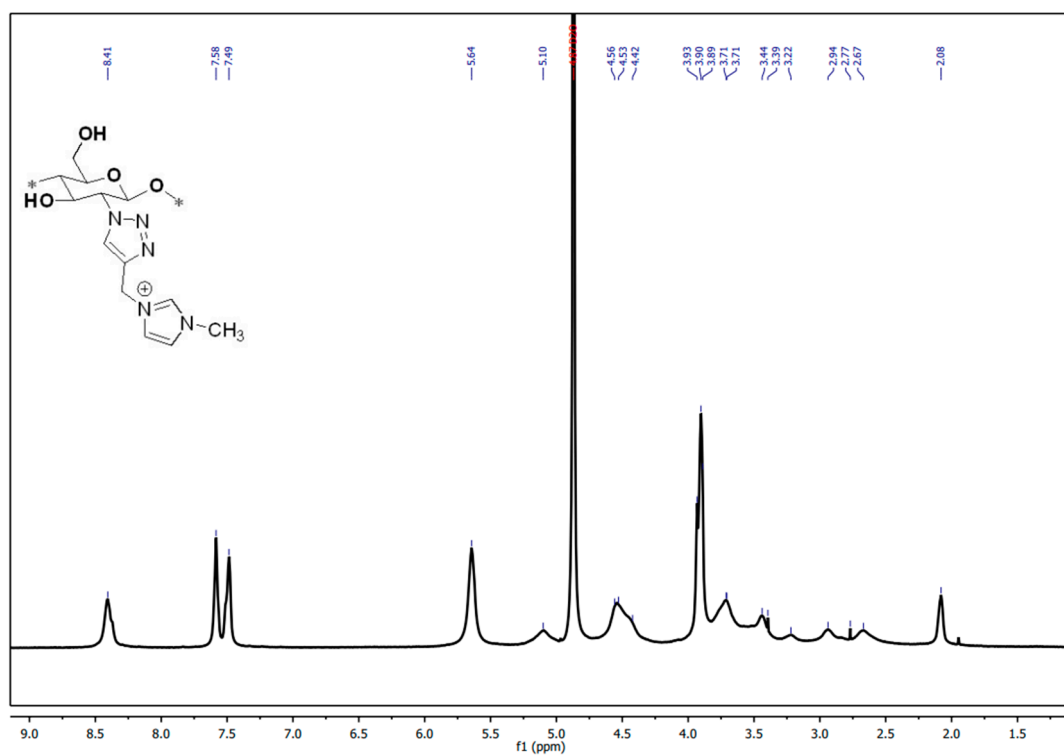

**Figure S3.** Proton NMR of **1–8**.



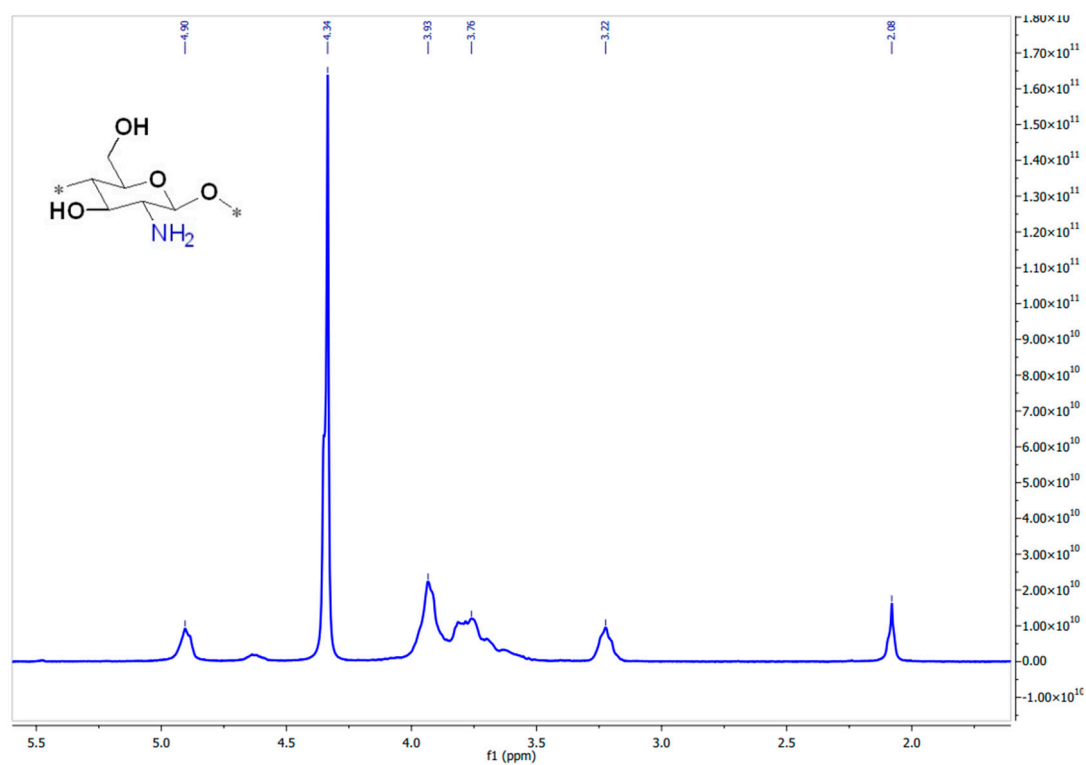

Figure S4. Proton NMR for Chitosan at 343 K.

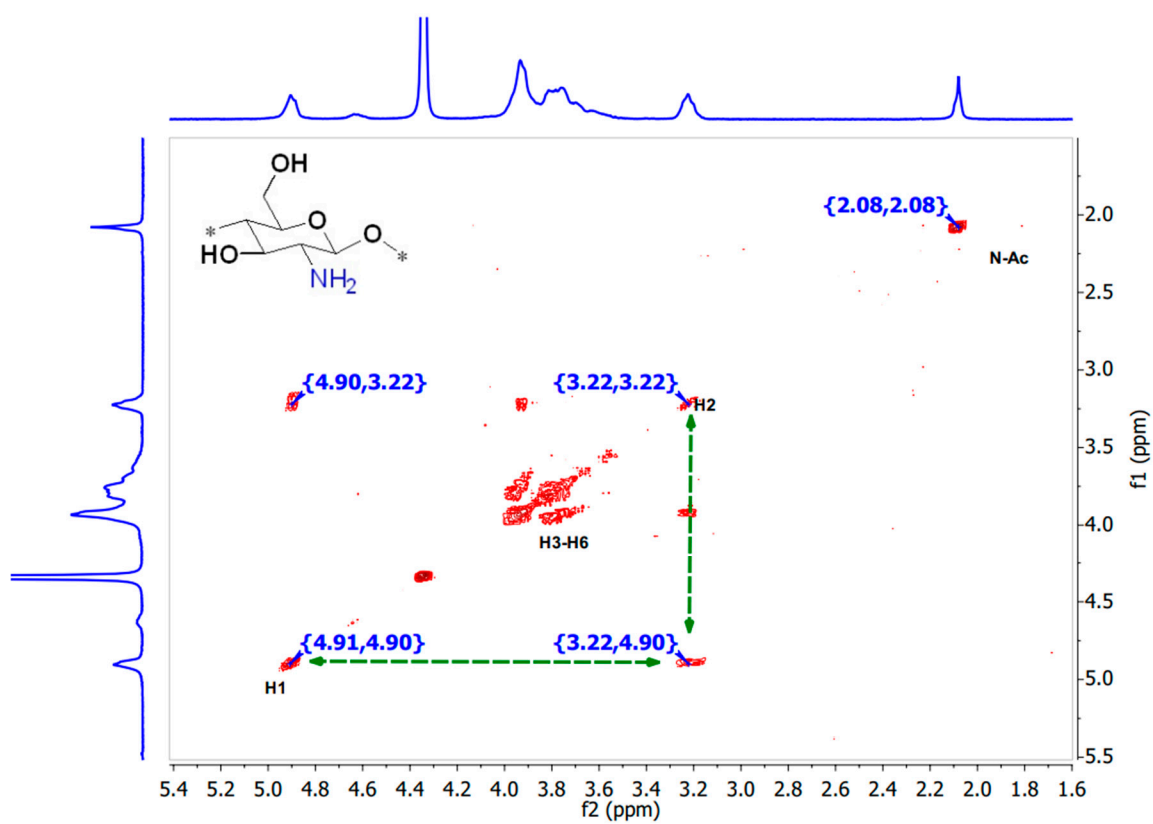

Figure S5. COSY NMR for Chitosan at 343 K.

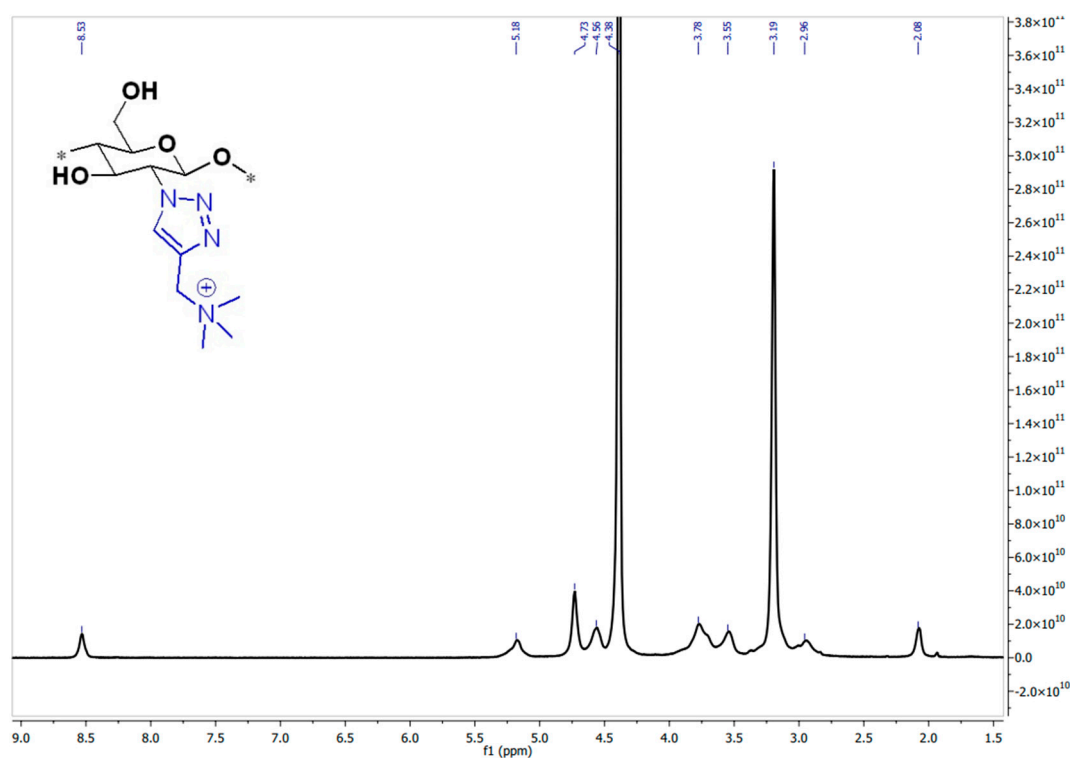

Figure S6. Proton NMR for Chitotriazolan derivatives 1 at 343 K.

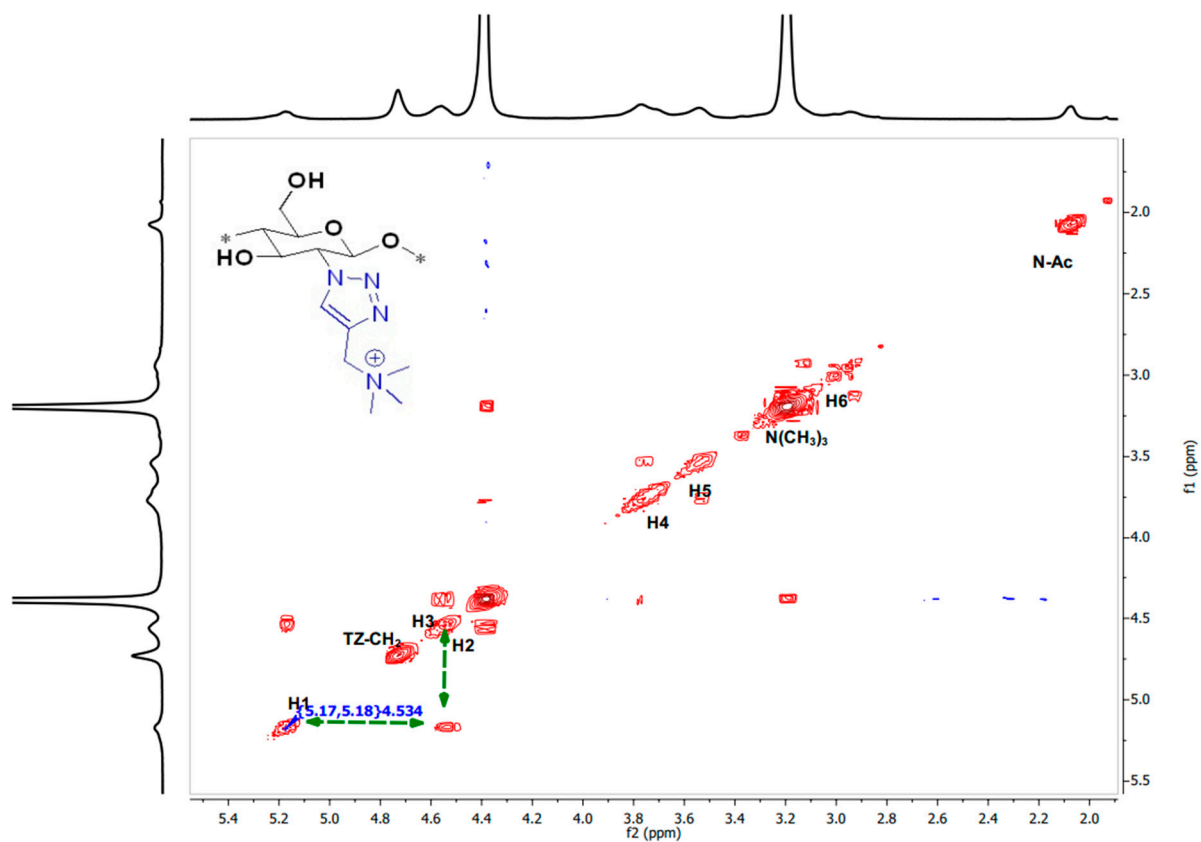

Figure S7. COSY NMR for Chitotriazolan derivatives 1 at 343 K.

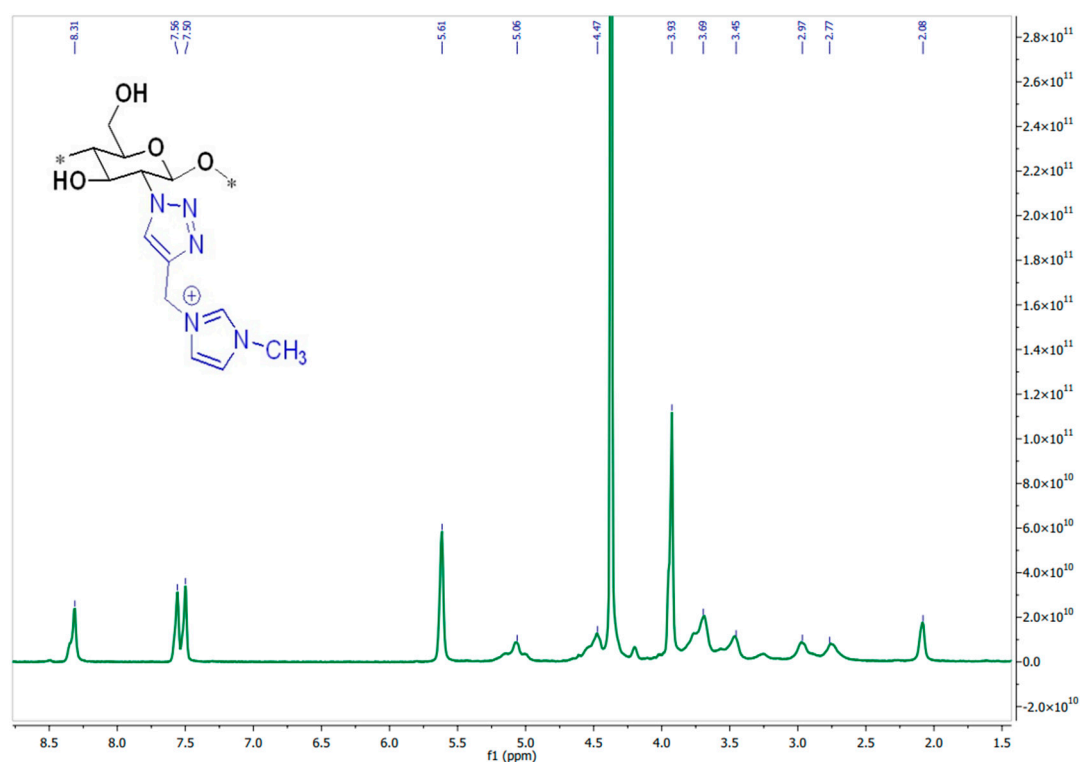

Figure S8. Proton NMR for Chitotriazolan derivatives 6 at 343 K.

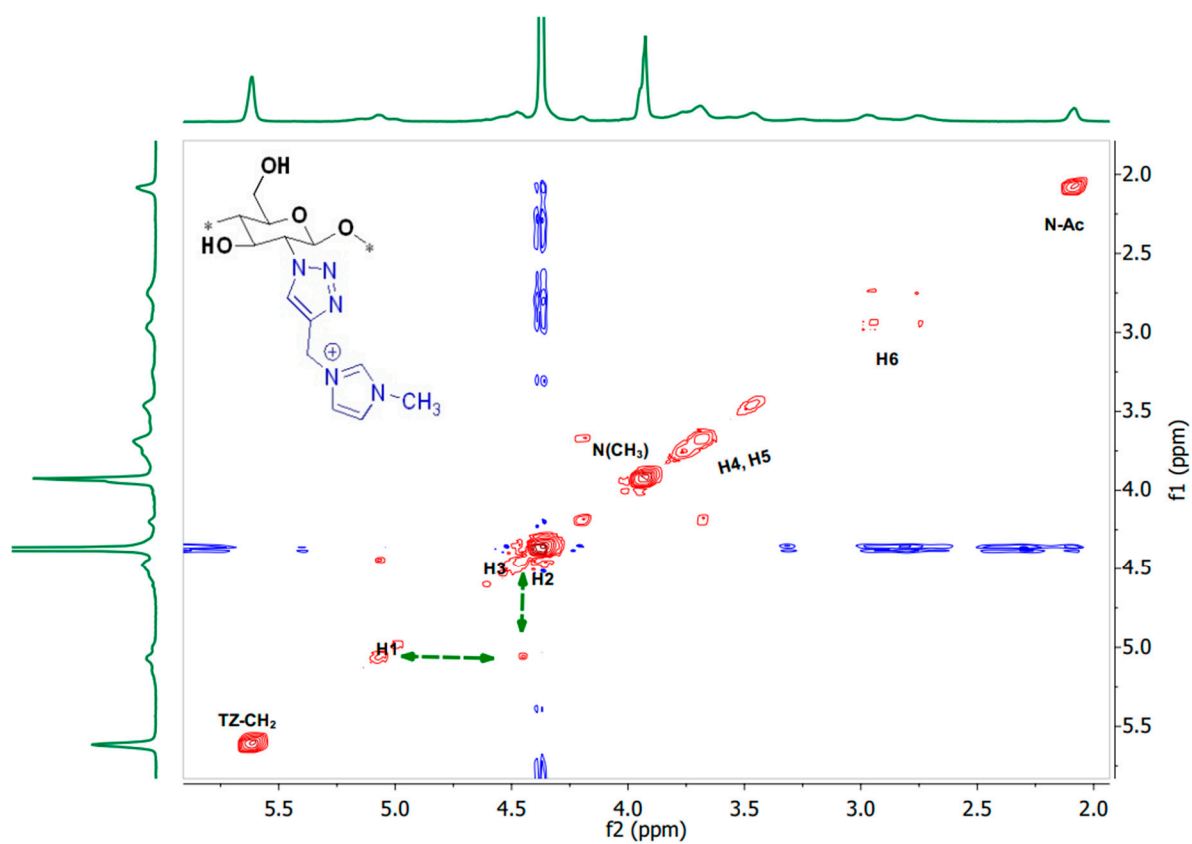

Figure S9. COSY NMR for Chitotriazolan derivatives 6 at 343 K.

## Proton NMR of 1a

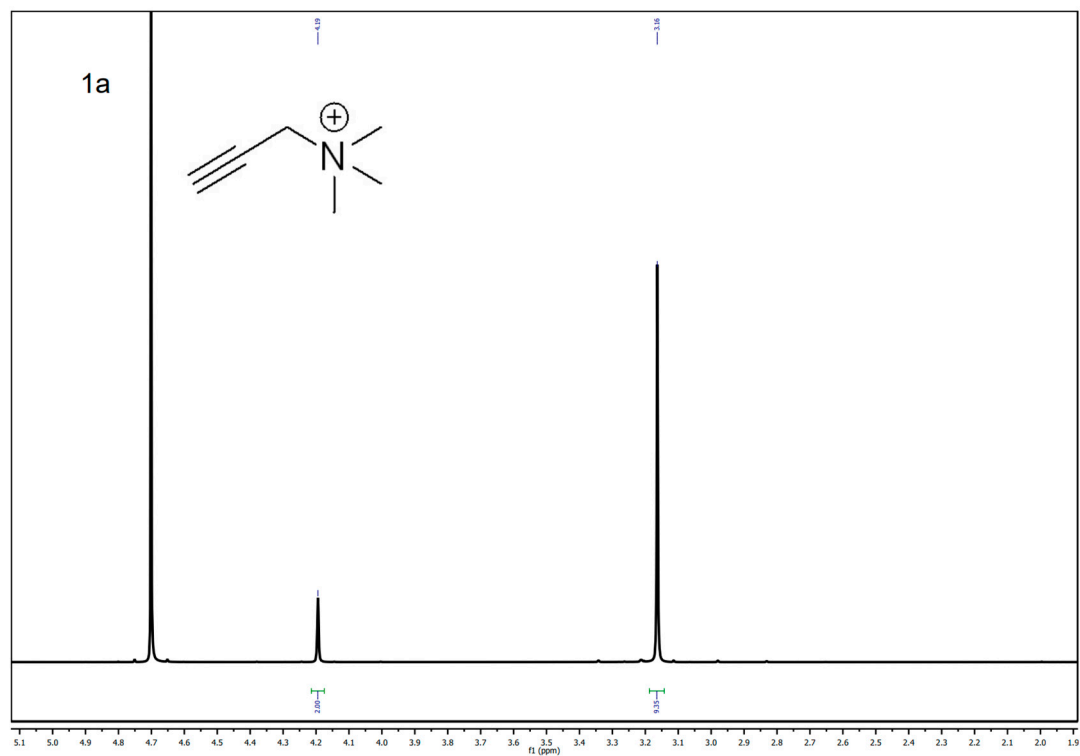

## Proton NMR of 2a

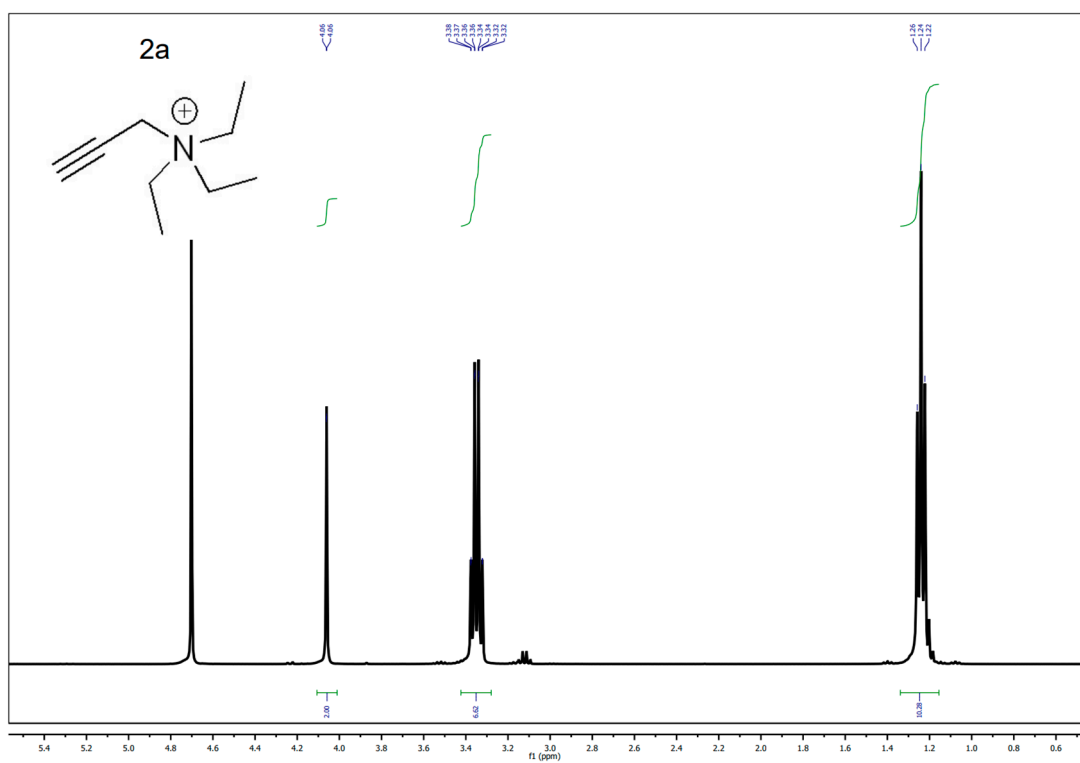

## Proton NMR of 3a

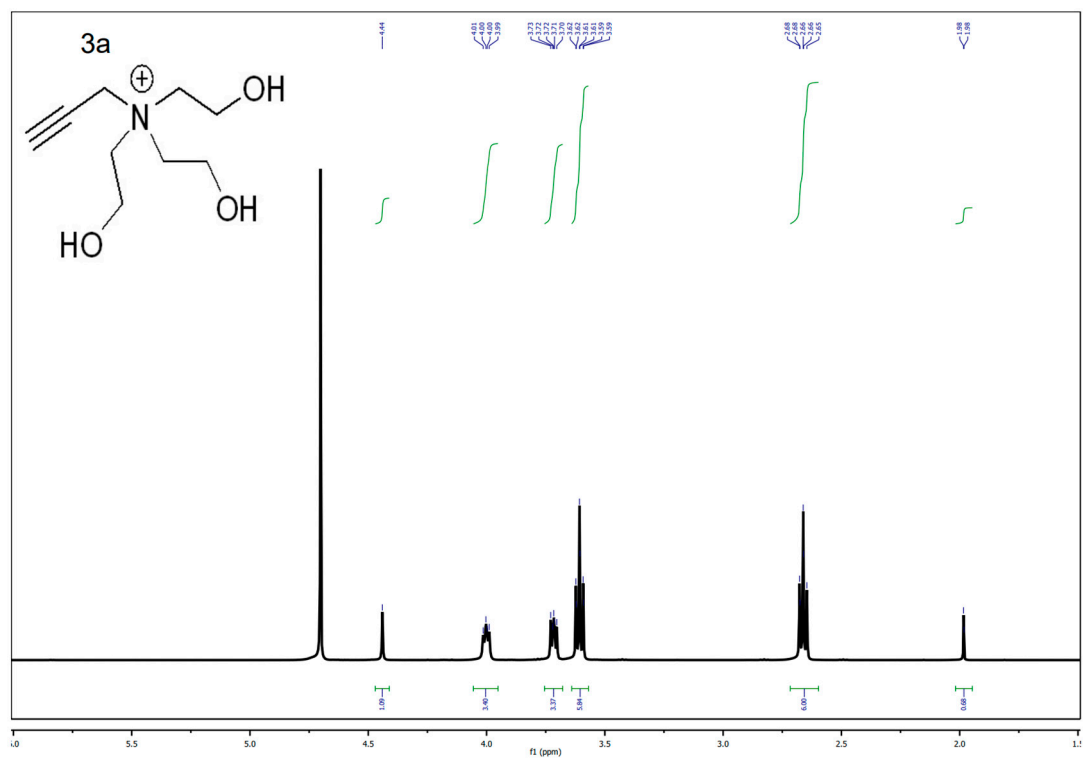

## Proton NMR of 4a

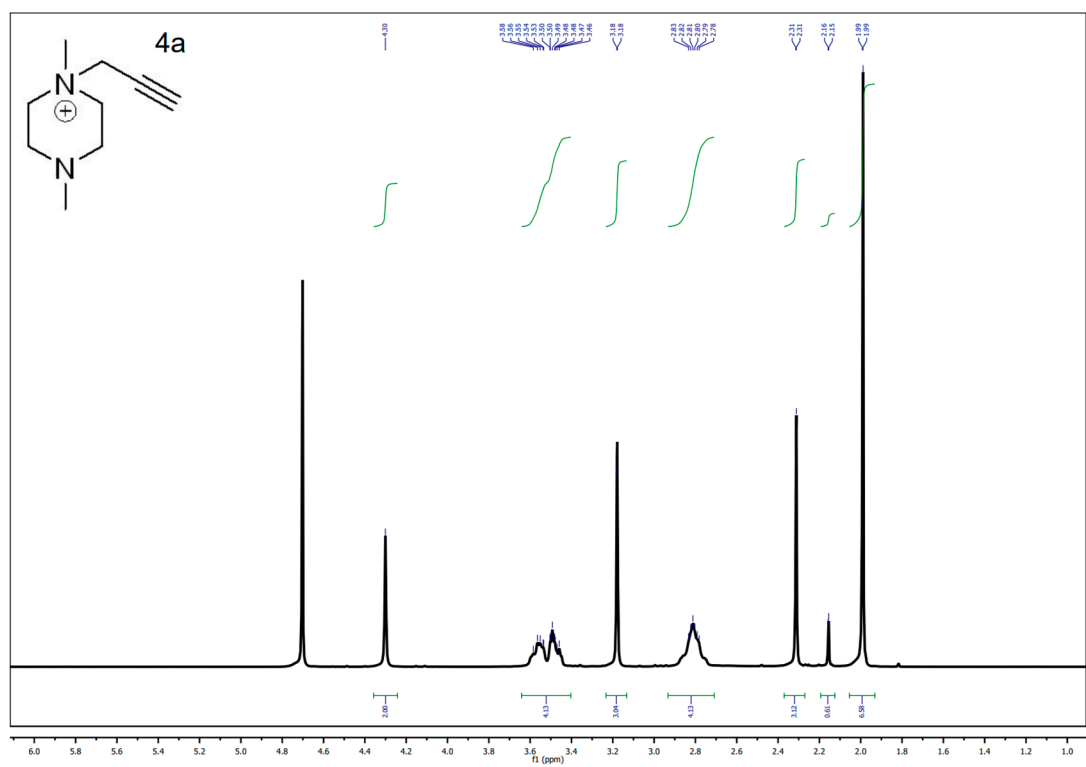

## Proton NMR of 5a

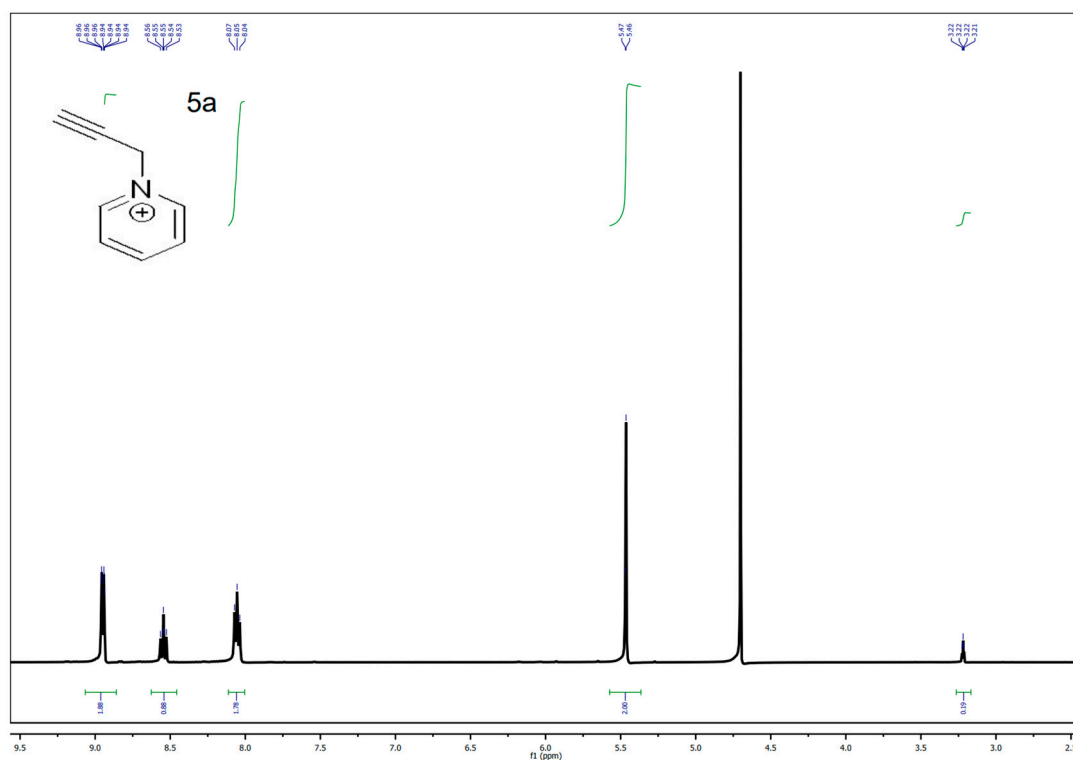

## Proton NMR of 6a

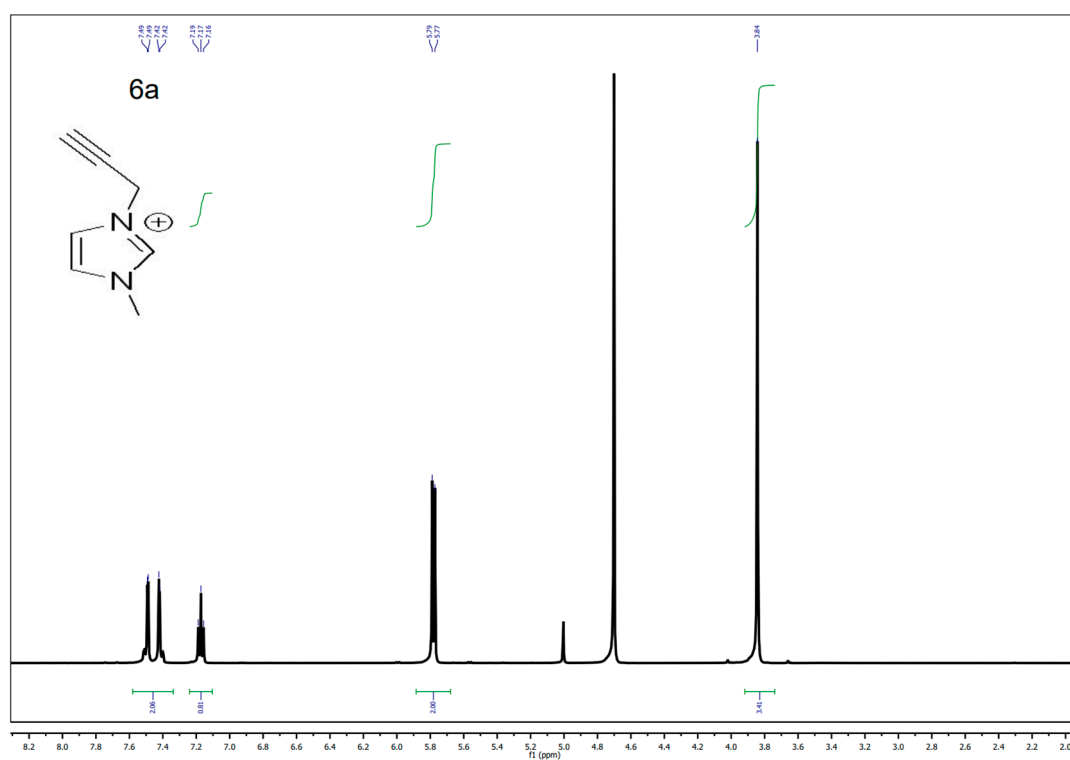

## Proton NMR of 7a

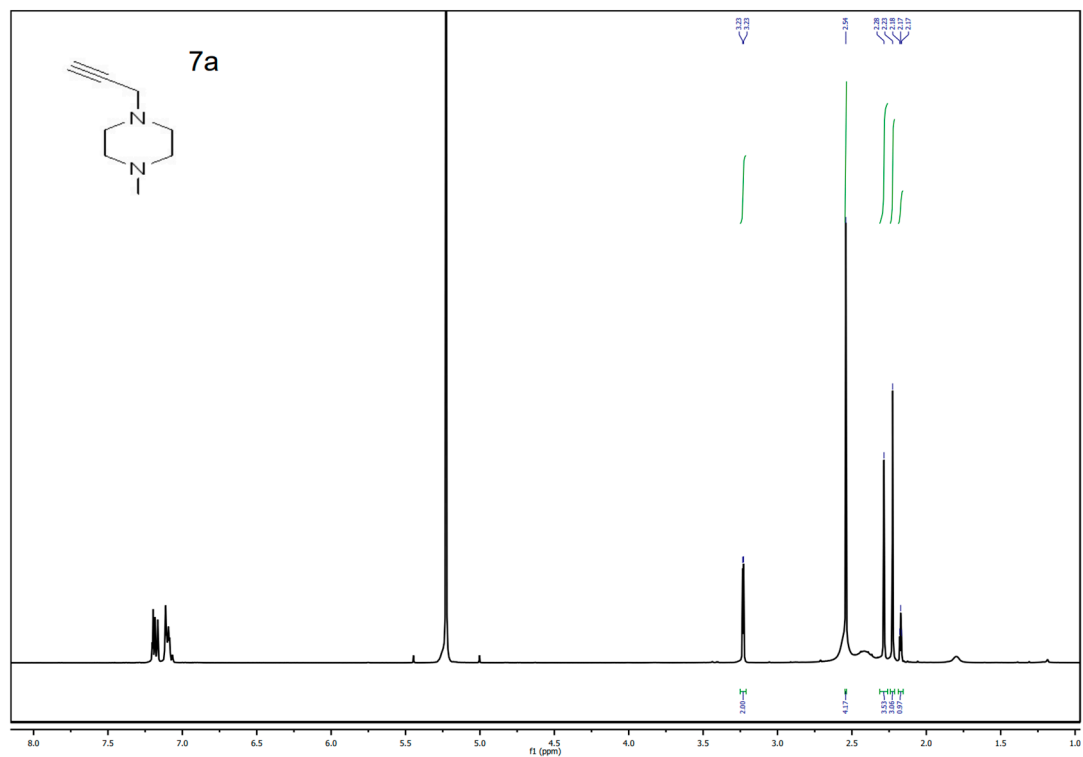

## Proton NMR of 8a

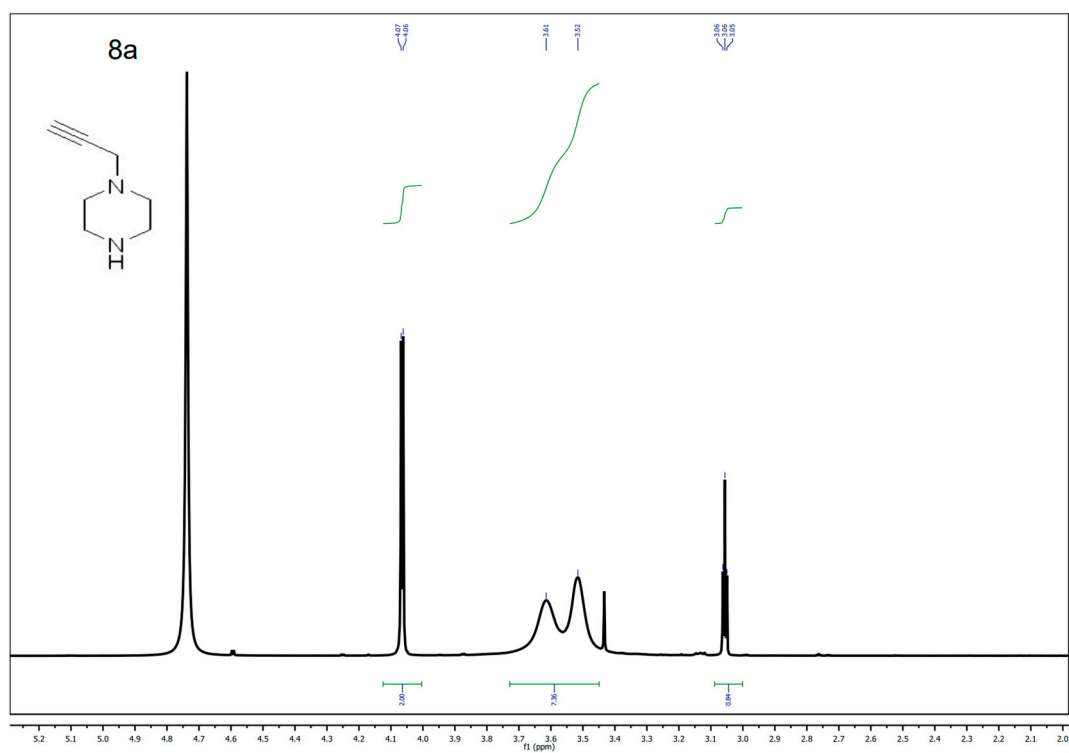

## Proton NMR of 9a

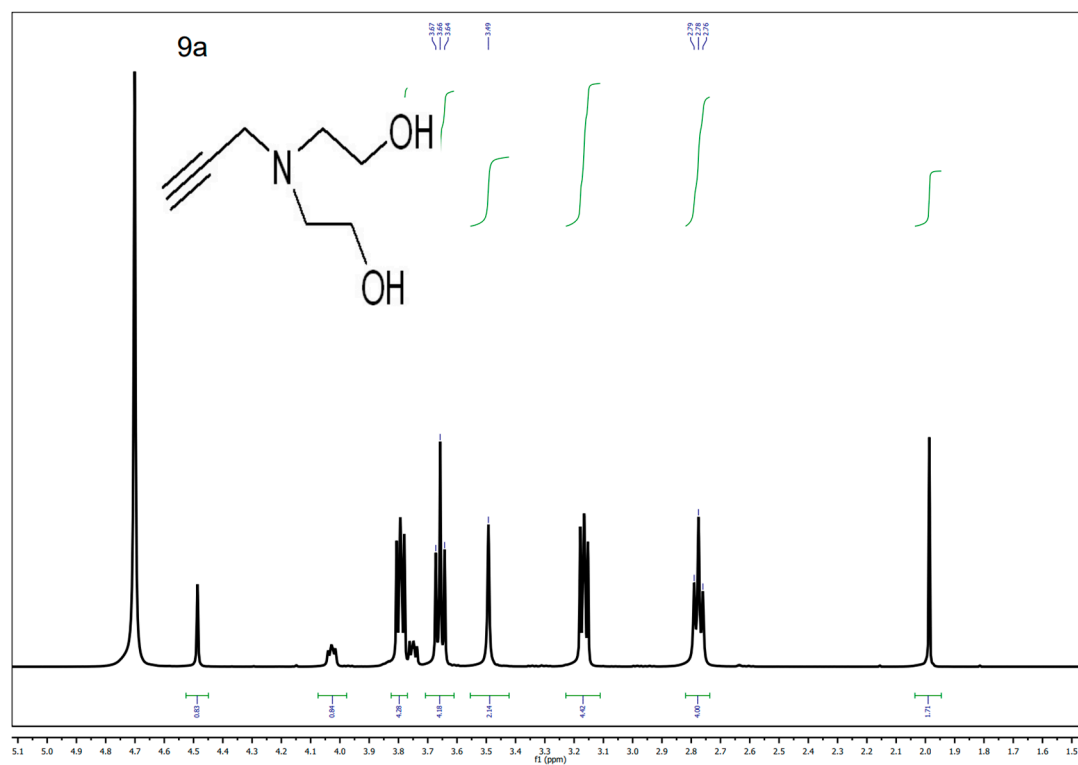

Figure S10. Proton NMR of 1a–9a.



## IR Spectra of Chitosan Azide

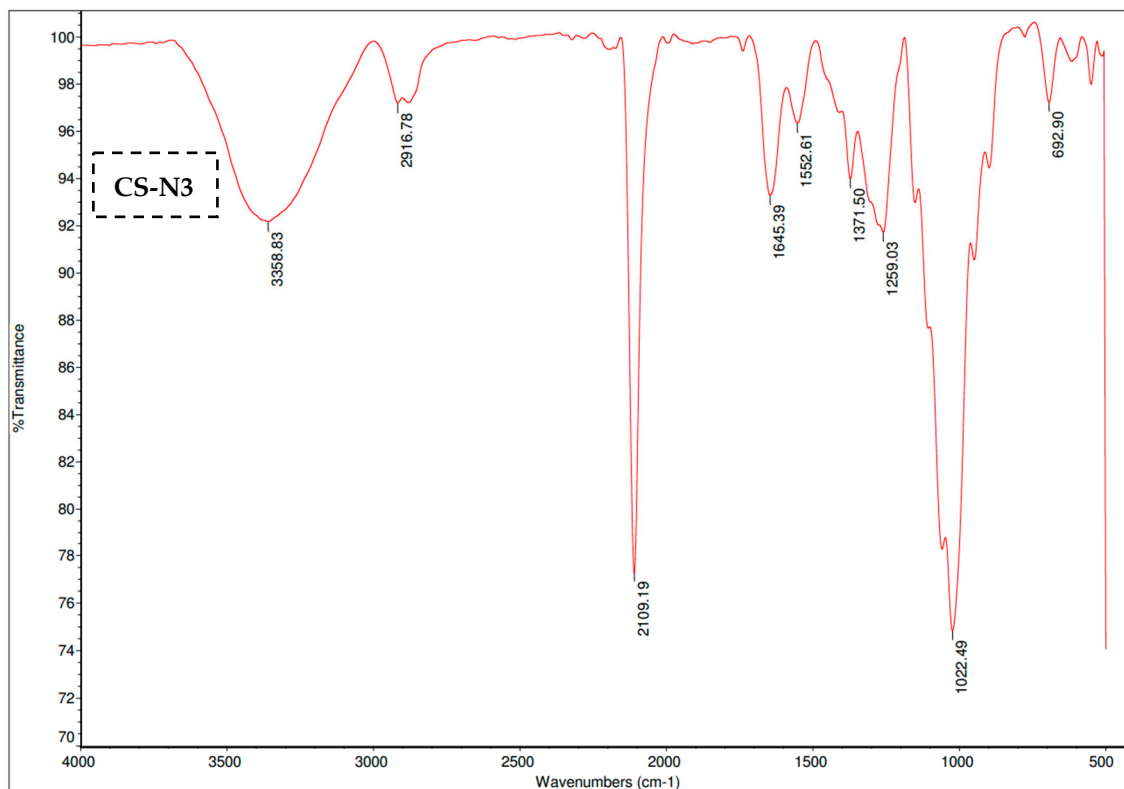

## Compound 1

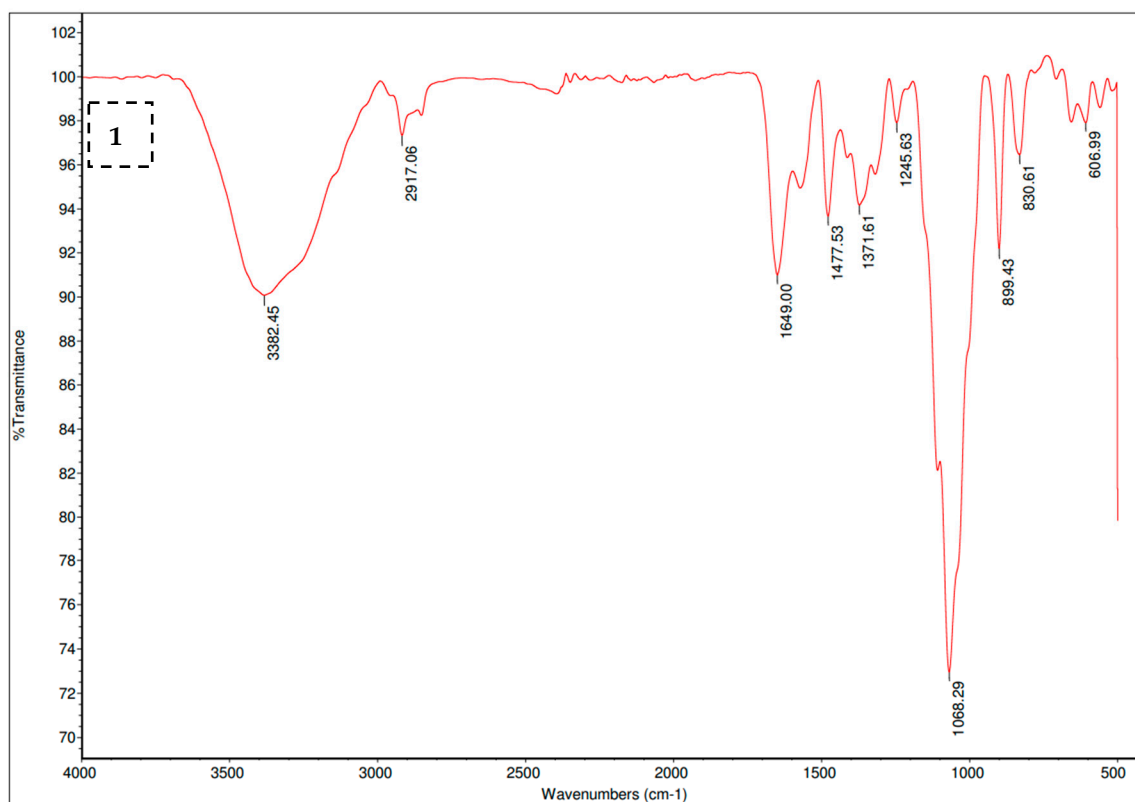

## Compound 2

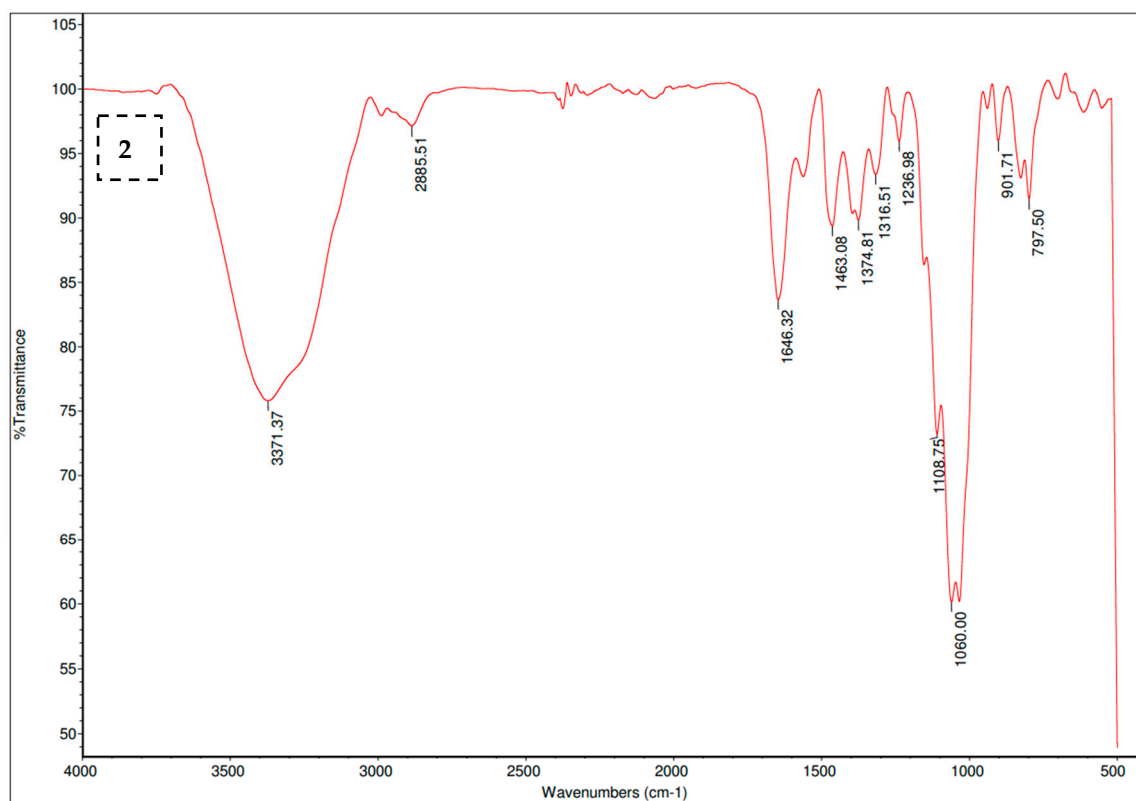

## Compound 3

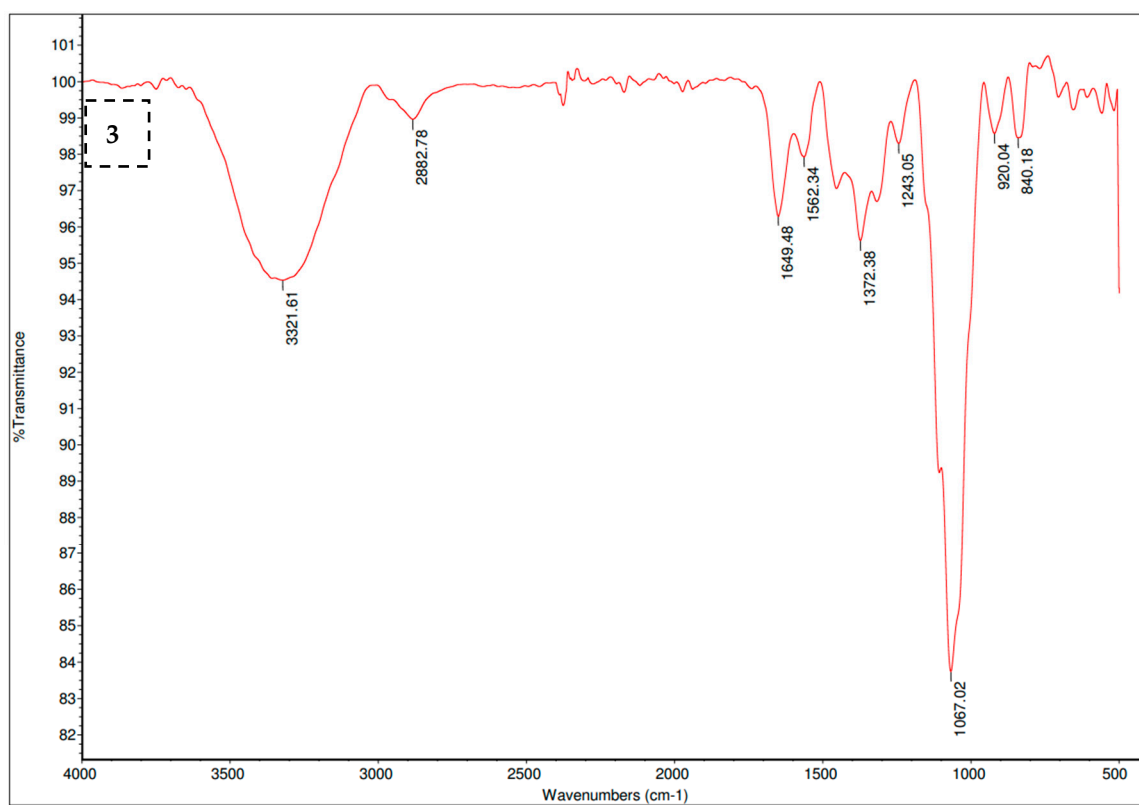

**Compound 4**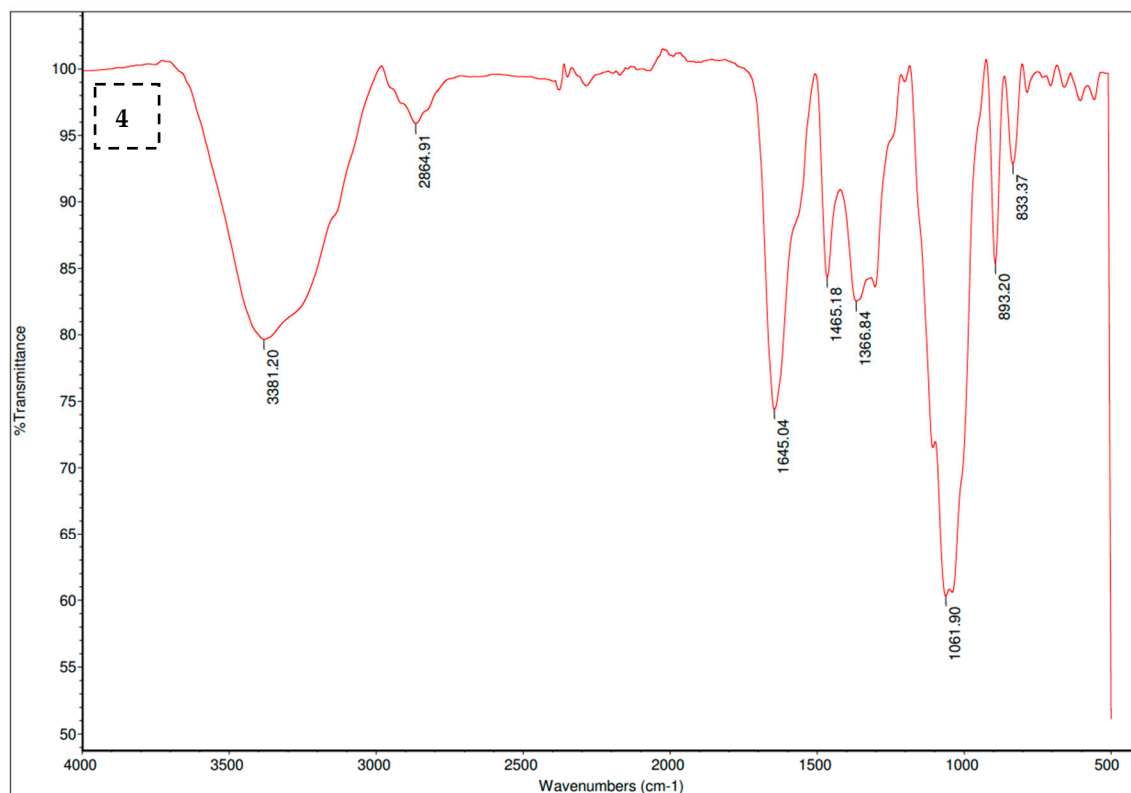**Compound 5**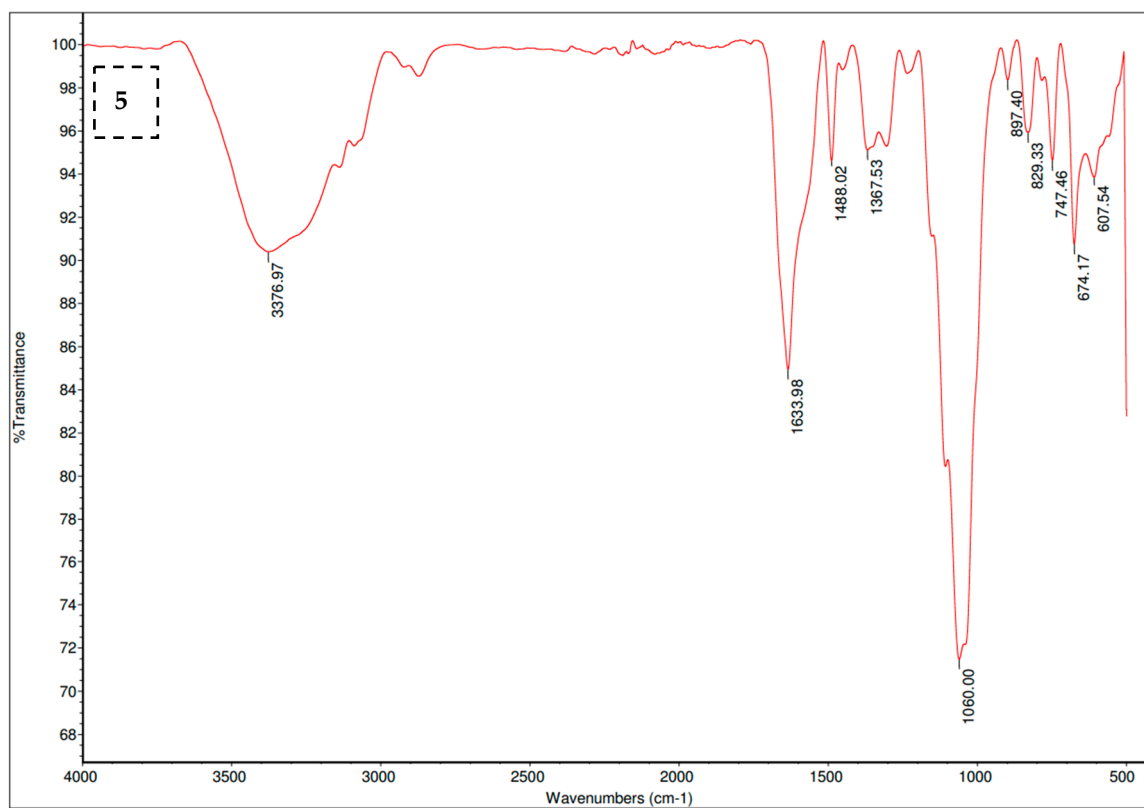

**Compound 6**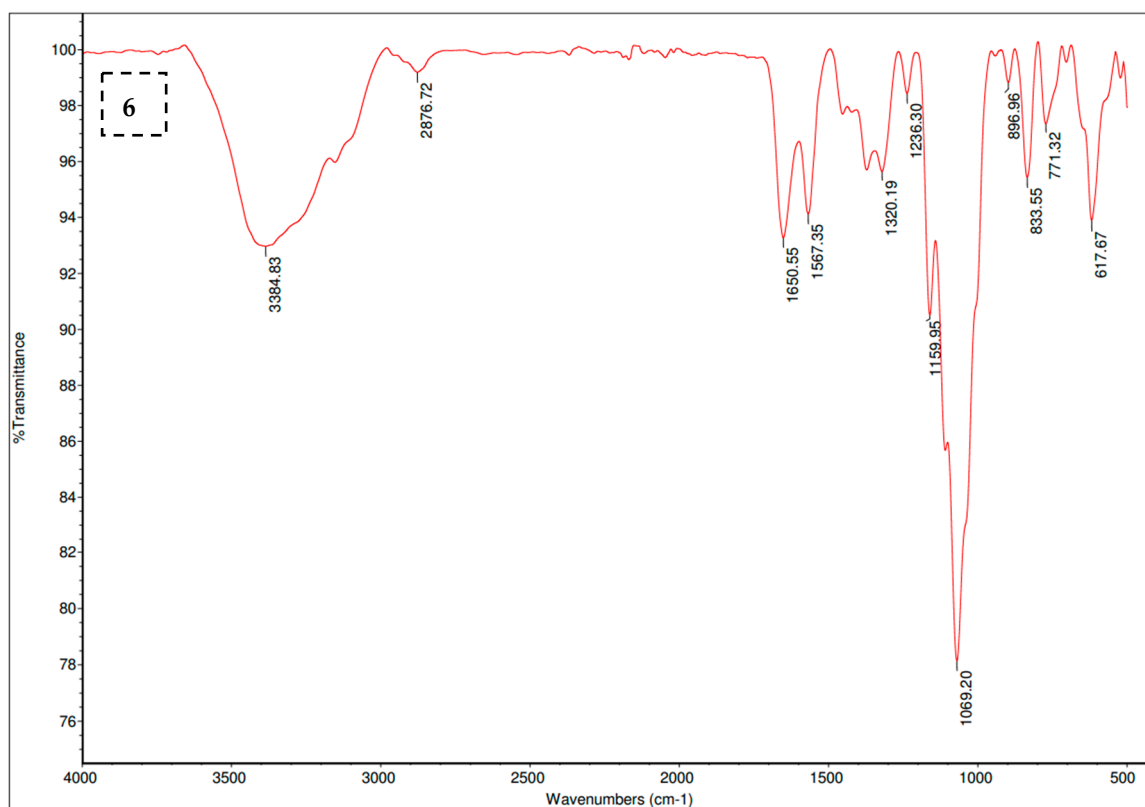**Compound 7**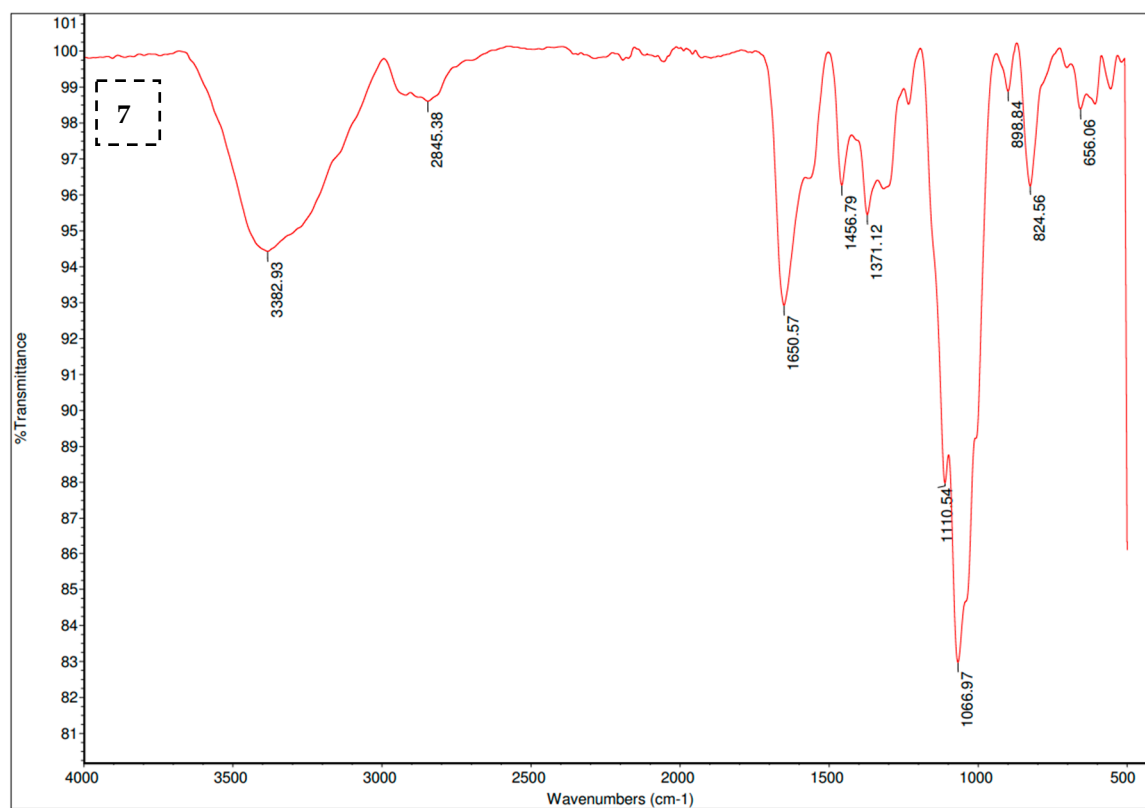

**Compound 8**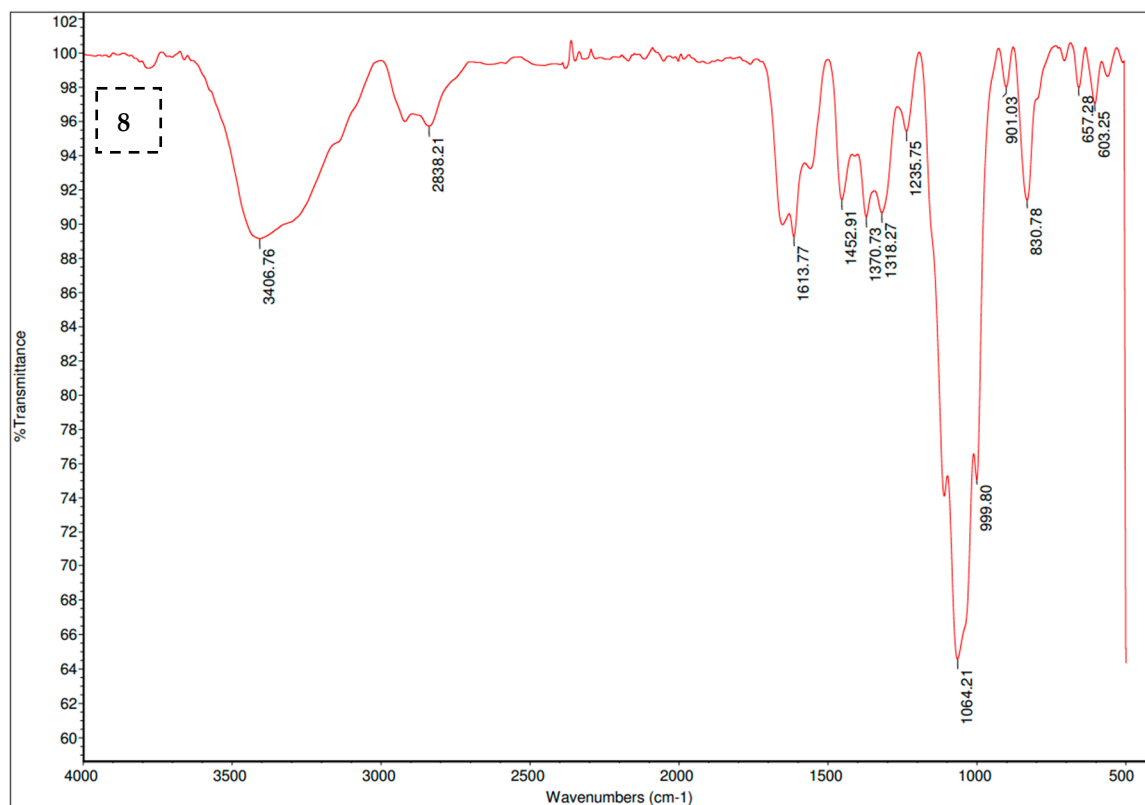**Compound 9**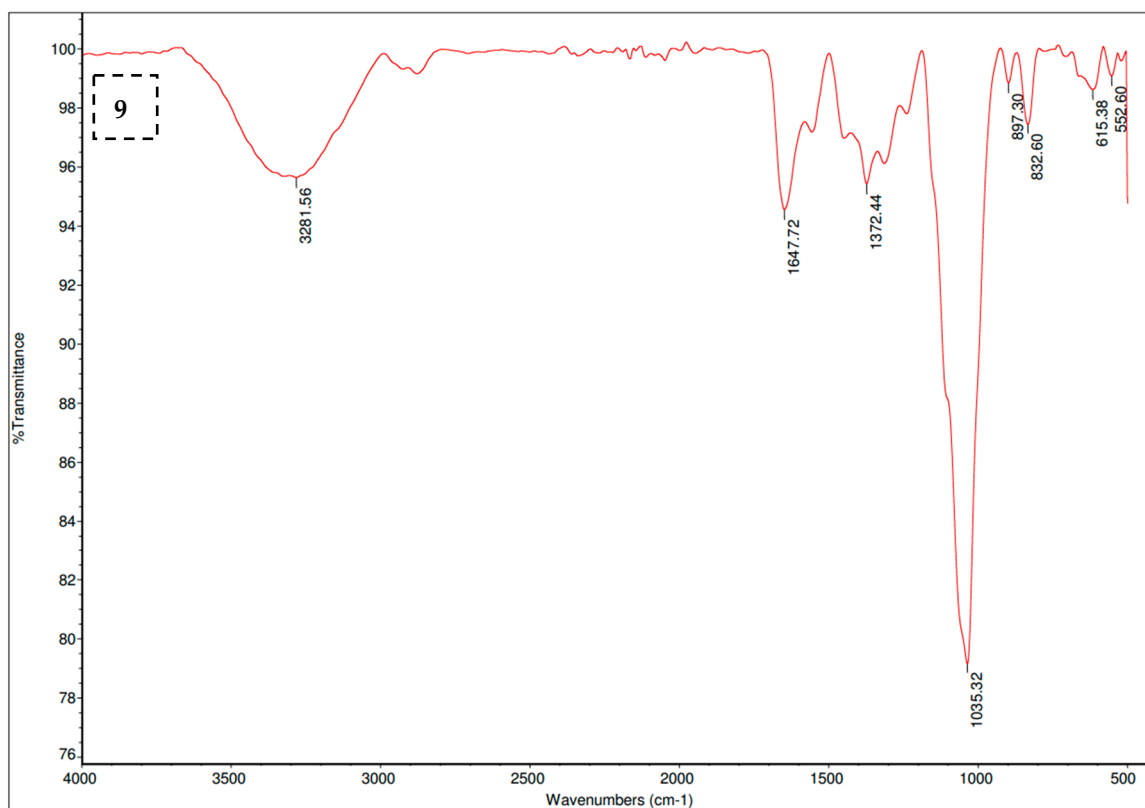**Figure S11.** IR Spectra of Chitosan Azide and Compounds 1–9.
